# Supplementary material for: Enhanced Anti-Cancer Effects of Conditioned Medium from Hypoxic Human Adult Dermal Fibroblasts on Cervical Cancer Cells
Source: MDPI journal article supplement (doi:10.3390/ijms23095134), 2022-05-04
Supplement: s1 [file s1]

**Table S1.** Proteins up- and down-regulated in H-CM compared with N-CM (>2-fold).

| <b>Protein</b> | <b>Fold change</b> | <b>SwissProt</b> |
|----------------|--------------------|------------------|
| LTBR           | 6.189 (+)          | P36941           |
| FGF10          | 3.507 (+)          | O15520           |
| VEGFA          | 3.236 (+)          | P15692           |
| LYVE1          | 2.568 (+)          | Q9Y5Y7           |
| MMP14          | 2.493 (+)          | P50281           |
| TNFRSF10C      | 2.429 (+)          | O14798           |
| IL2RG          | 2.411 (+)          | P31785           |
| TGFBR2         | 2.407 (+)          | P37173           |
| CX3CL1         | 2.217 (+)          | P78423           |
| DKKL1          | 2.207 (+)          | Q9UK85           |
| CCL4           | 2.200 (+)          | P13236           |
| CCL18          | 2.164 (+)          | P55774           |
| SLC2A3         | 2.150 (+)          | P11169           |
| IL37           | 2.144 (+)          | Q9NZH6           |
| LECT2          | 2.139 (+)          | O14960           |
| TNFSF15        | 2.120 (+)          | O95150           |
| NID1           | 2.120 (+)          | P14543           |
| CXCL12         | 2.077 (+)          | P48061           |
| IL17C          | 2.056 (+)          | Q9P0M4           |
| KIT            | 2.032 (+)          | P10721           |
| TIMP2          | 2.143 (-)          | P16035           |
| GRN            | 2.158 (-)          | P28799           |
| FGA            | 2.191 (-)          | P02671           |
| UBB            | 2.481 (-)          | P0CG47           |
| F13A1          | 2.737 (-)          | P00488           |
| THBS1          | 2.843 (-)          | P07996           |
| PTHLH          | 3.365 (-)          | P12272           |
| FN1            | 3.498 (-)          | P02751           |
| TNFRSF1A       | 3.822 (-)          | P19438           |
| EDA            | 9.549 (-)          | Q92838           |
| MMP1           | 11.116 (-)         | P03956           |
| PLG            | 14.235 (-)         | P00747           |

**Table S2.** GO terms for proteins up-regulated in H-CM compared with N-CM ( $p < 0.01$ ).

| DAVID       | Category           | Term                                                                        | Protein                                                                 | $-\log_{10}$<br>(p-value) |
|-------------|--------------------|-----------------------------------------------------------------------------|-------------------------------------------------------------------------|---------------------------|
| GO analysis | Biological process | GO:0006955, immune response                                                 | TNFRSF10C, LTBR, TNFSF15, IL2RG, CX3CL1, CXCL12, CCL4, CCL18, IL37      | 8.062                     |
|             |                    | GO:0006954, inflammatory response                                           | IL17C, TNFRSF10C, LTBR, KIT, CXCL12, CCL4, CCL18, IL37                  | 6.948                     |
|             |                    | GO:0007165, signal transduction                                             | TNFRSF10C, LYVE1, LTBR, TNFSF15, IL2RG, KIT, DKKL1, CXCL12, CCL4, CCL18 | 5.766                     |
|             |                    | GO:0070374, positive regulation of ERK1 and ERK2 cascade                    | VEGFA, FGF10, CX3CL1, CCL4, CCL18                                       | 4.408                     |
|             |                    | GO:0070098, chemokine-mediated signaling pathway                            | CX3CL1, CXCL12, CCL4, CCL18                                             | 4.175                     |
|             |                    | GO:0050930, induction of positive chemotaxis                                | VEGFA, FGF10, CXCL12                                                    | 3.899                     |
|             |                    | GO:0048754, branching morphogenesis of an epithelial tube                   | VEGFA, FGF10, MMP14                                                     | 3.520                     |
|             |                    | GO:0043547, positive regulation of GTPase activity                          | FGF10, IL2RG, CX3CL1, KIT, CCL4, CCL18                                  | 3.478                     |
|             |                    | GO:0006935, chemotaxis                                                      | CX3CL1, LECT2, CXCL12, CCL18                                            | 3.478                     |
|             |                    | GO:0050918, positive chemotaxis                                             | VEGFA, FGF10, CXCL12                                                    | 3.152                     |
|             |                    | GO:0001666, response to hypoxia                                             | VEGFA, TGFB2, MMP14, CXCL12                                             | 3.043                     |
|             |                    | GO:0002548, monocyte chemotaxis                                             | CX3CL1, CCL4, CCL18                                                     | 2.993                     |
|             |                    | GO:0001541, ovarian follicle development                                    | VEGFA, KIT, MMP14                                                       | 2.993                     |
|             |                    | GO:0042127, regulation of cell proliferation                                | TNFRSF10C, LTBR, TGFB2, KIT                                             | 2.951                     |
|             |                    | GO:0071346, cellular response to interferon-gamma                           | CX3CL1, CCL4, CCL18                                                     | 2.729                     |
|             |                    | GO:0009612, response to mechanical stimulus                                 | TGFB2, MMP14, CXCL12                                                    | 2.700                     |
|             |                    | GO:0060326, cell chemotaxis                                                 | CX3CL1, KIT, CXCL12                                                     | 2.617                     |
|             |                    | GO:0030593, neutrophil chemotaxis                                           | CX3CL1, CCL4, CCL18                                                     | 2.603                     |
|             |                    | GO:0071347, cellular response to interleukin-1                              | CX3CL1, CCL4, CCL18                                                     | 2.541                     |
|             |                    | GO:0050729, positive regulation of inflammatory response                    | CX3CL1, CCL4, CCL18                                                     | 2.517                     |
|             |                    | GO:0071356, cellular response to tumor necrosis factor                      | CX3CL1, CCL4, CCL18                                                     | 2.170                     |
|             |                    | GO:0045766, positive regulation of angiogenesis                             | VEGFA, TGFB2, CX3CL1                                                    | 2.133                     |
|             |                    | GO:0033209, tumor necrosis factor-mediated signaling pathway                | TNFRSF10C, LTBR, TNFSF15                                                | 2.111                     |
|             |                    | GO:0048842, positive regulation of axon extension involved in axon guidance | VEGFA, CXCL12                                                           | 2.103                     |

2  
3  
4  
5  
6

|  |  |                                                 |                   |       |
|--|--|-------------------------------------------------|-------------------|-------|
|  |  | GO:0019221, cytokine-mediated signaling pathway | CX3CL1, KIT, IL37 | 2.024 |
|--|--|-------------------------------------------------|-------------------|-------|

**Table S3.** GO terms of proteins down-regulated in H-CM compared with N-CM (p < 0.01).

| DAVID          | Category              | Term                                                         | Protein                     | $-\log_{10}$<br>(p-value) |
|----------------|-----------------------|--------------------------------------------------------------|-----------------------------|---------------------------|
| GO<br>analysis | Biological<br>process | GO:0002576, platelet degranulation                           | FGA, F13A1, THBS1, PLG, FN1 | 6.370                     |
|                |                       | GO:0022617, extracellular matrix disassembly                 | TIMP2, PLG, MMP1, FN1       | 4.844                     |
|                |                       | GO:0044267, cellular protein metabolic process               | FGA, UBB, PLG, MMP1         | 4.271                     |
|                |                       | GO:0018149, peptide cross-linking                            | F13A1, THBS1, FN1           | 3.328                     |
|                |                       | GO:0033209, tumor necrosis factor-mediated signaling pathway | TNFRSF1A, UBB, EDA          | 2.588                     |
|                |                       | GO:0007596, blood coagulation                                | FGA, F13A1, PLG             | 2.211                     |
|                |                       | GO:0051918, negative regulation of fibrinolysis              | THBS1, PLG                  | 2.185                     |
|                |                       | GO:0030198, extracellular matrix organization                | FGA, THBS1, FN1             | 2.158                     |

7

**Table S4.** Intracellular proteins up- and down-regulated in HeLa cells treated with H-CM compared with N-CM (>2-fold).

| <b>Protein</b> | <b>Fold change</b> | <b>SwissProt</b> |
|----------------|--------------------|------------------|
| SLC6A16        | 5.235 (+)          | Q9GZN6           |
| GRTP1          | 3.786 (+)          | Q5TC63           |
| GPRIN2         | 3.252 (+)          | O60269           |
| TNF            | 3.002 (+)          | P01375           |
| SLU7           | 2.928 (+)          | O95391           |
| RAB40B         | 2.797 (+)          | Q12829           |
| CLDN6          | 2.719 (+)          | P56747           |
| UBR1           | 2.578 (+)          | Q8I WV7          |
| KRT15          | 2.573 (+)          | P19012           |
| RAB11FIP4      | 2.558 (+)          | Q86YS3           |
| PTGS1          | 2.427 (+)          | P23219           |
| ACAD10         | 2.402 (+)          | Q6JQN1           |
| TUBGCP3        | 2.331 (+)          | Q96CW5           |
| COL3A1         | 2.315 (+)          | P02461           |
| F12            | 2.300 (+)          | P00748           |
| REN            | 2.297 (+)          | P00797           |
| PLK2           | 2.206 (+)          | Q9NYY3           |
| GAD1           | 2.075 (+)          | Q99259           |
| ACVR1C         | 2.058 (+)          | Q8NER5           |
| SERPINB9       | 2.006 (+)          | P50453           |
| SPTBN5         | 2.002 (-)          | Q9NRC6           |
| SLC4A10        | 2.005 (-)          | Q6U841           |
| BCL10          | 2.018 (-)          | O95999           |
| LILRA1         | 2.020 (-)          | O75019           |
| FES            | 2.022 (-)          | P07332           |
| POLA1          | 2.022 (-)          | P09884           |
| S100A6         | 2.027 (-)          | P06703           |
| LCK            | 2.030 (-)          | P06239           |
| MCL1           | 2.035 (-)          | Q07820           |
| ADGRE1         | 2.042 (-)          | Q14246           |
| TNXB           | 2.044 (-)          | P22105           |
| GATA1          | 2.055 (-)          | P15976           |
| MRC2           | 2.069 (-)          | Q9UBG0           |
| HMGB1          | 2.070 (-)          | P09429           |
| SLC25A6        | 2.070 (-)          | P12236           |
| DNM1           | 2.071 (-)          | Q05193           |
| POU2F2         | 2.073 (-)          | P09086           |
| SVOP           | 2.081 (-)          | Q8N4V2           |
| ACTR3          | 2.082 (-)          | P61158           |
| SLC24A4        | 2.087 (-)          | Q8NFF2           |
| USP19          | 2.089 (-)          | O94966           |
| POLL           | 2.090 (-)          | Q9UGP5           |
| ADRA2A         | 2.096 (-)          | P08913           |
| SLC28A2        | 2.098 (-)          | O43868           |
| PTH            | 2.113 (-)          | P01270           |
| LDLRAD1        | 2.118 (-)          | Q5T700           |
| USP24          | 2.122 (-)          | Q9UPU5           |

|         |           |               |
|---------|-----------|---------------|
| HSFX1   | 2.137 (-) | Q9UBD0        |
| USP30   | 2.140 (-) | Q70CQ3        |
| ESR1    | 2.142 (-) | P57753        |
| ELK1    | 2.165 (-) | P19419        |
| PCNA    | 2.172 (-) | P12004        |
| CD8A    | 2.181 (-) | P01732/P10966 |
| ADGRE2  | 2.182 (-) | Q9UHX3        |
| USP13   | 2.200 (-) | Q92995        |
| CHEK1   | 2.205 (-) | O14757        |
| NFE2L2  | 2.217 (-) | Q16236        |
| TNNI3   | 2.246 (-) | P19429        |
| PRKN    | 2.254 (-) | O60260        |
| CD19    | 2.257 (-) | P15391        |
| ADH7    | 2.264 (-) | P40394        |
| APAF1   | 2.327 (-) | O14727        |
| SLK     | 2.328 (-) | Q9H2G2        |
| ACTG2   | 2.338 (-) | P63267        |
| TBP     | 2.355 (-) | P20226        |
| ALDH3B1 | 2.358 (-) | P43353        |
| IP6K2   | 2.393 (-) | Q9UHH9        |
| GPR18   | 2.408 (-) | Q14330        |
| SLC5A3  | 2.416 (-) | P53794        |
| ANXA6   | 2.433 (-) | P08133        |
| TFAP2A  | 2.465 (-) | P05549        |
| HPRT1   | 2.468 (-) | P00492        |
| TPRA1   | 2.476 (-) | Q86W33        |
| IAPP    | 2.501 (-) | P10997        |
| LDLRAD2 | 2.540 (-) | Q5SZI1        |
| CCNL1   | 2.596 (-) | Q9UK58        |

---

**Table S5.** GO and KEGG pathways of intracellular proteins down-regulated in HeLa cells treated with H-CM compared with N-CM (p < 0.01).

| DAVID                 | Category           | Term                                                      | Protein                                        | −log <sub>10</sub><br>(p-value) |
|-----------------------|--------------------|-----------------------------------------------------------|------------------------------------------------|---------------------------------|
| GO analysis           | Biological process | GO:0016579, protein deubiquitination                      | USP30, USP19, USP24, USP13                     | 2.448                           |
|                       |                    | GO:0042981, regulation of apoptotic process               | BCL10, MCL1, SLK, ESR1, APAF1                  | 2.373                           |
|                       |                    | GO:0006366, transcription from RNA polymerase II promoter | GATA1, POU2F2, ESR1, TFAP2A, ELK1, TBP, NFE2L2 | 2.311                           |
|                       |                    | GO:0006272, leading strand elongation                     | PCNA, POLA1                                    | 2.033                           |
| KEGG pathway analysis |                    | hsa05166:HTLV-I infection                                 | SLC25A6, LCK, PCNA, ELK1, CHEK1, TBP           | 2.422                           |
|                       |                    | hsa03410:base excision repair                             | POLL, HMGB1, PCNA                              | 2.078                           |
|                       |                    | hsa05340:primary immunodeficiency                         | CD19, CD8A, LCK                                | 2.053                           |
