# Supplementary material for: Enhanced Anti-Cancer Effects of Conditioned Medium from Hypoxic Human Adult Dermal Fibroblasts on Cervical Cancer Cells
Source: MDPI journal article supplement (doi:10.3390/ijms23095134), 2022-05-04
Supplement: s1 [file s1]

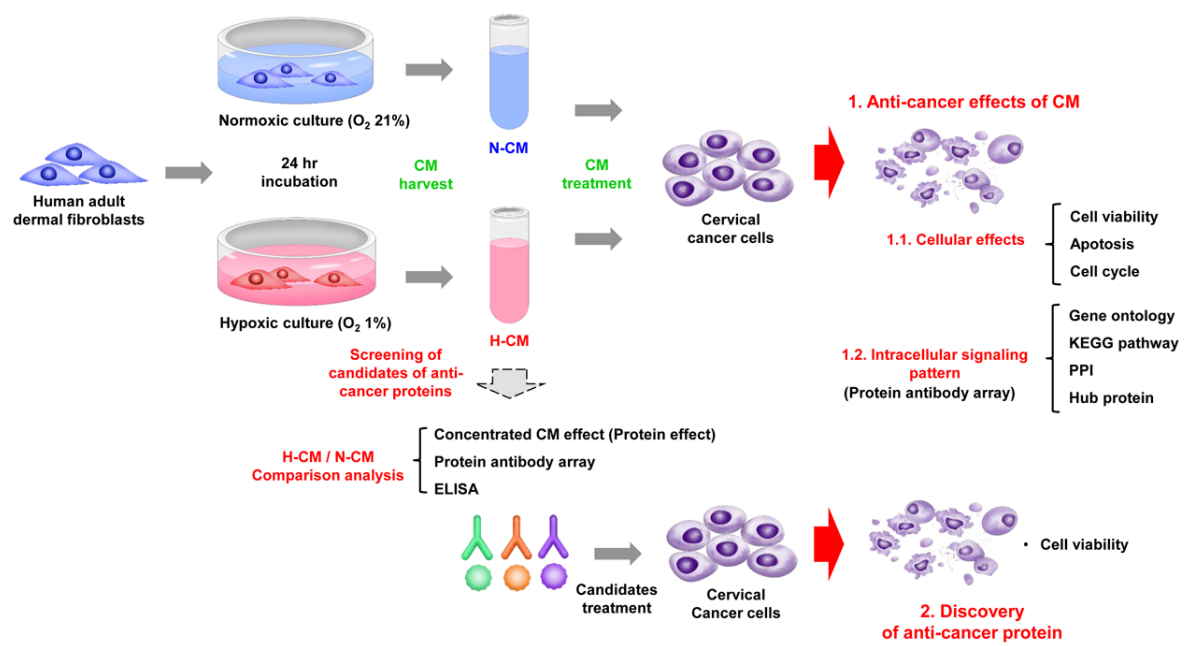

**Figure S1.** A graphical representation of study design.

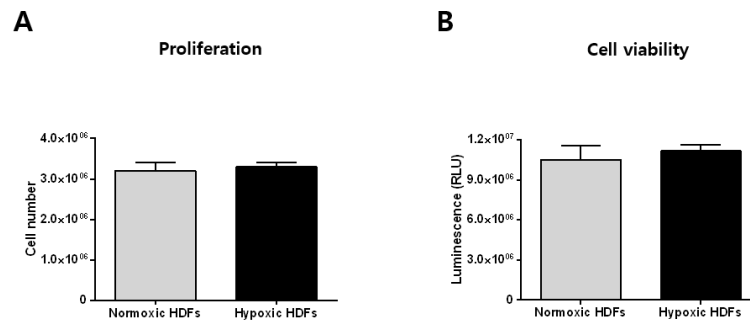

**Figure S2.** Cell viability of normoxic and hypoxic fibroblasts. Cell proliferation and cell viability of normoxic and hypoxic HDFs after 5 days of culture (A, B). The cells were cultured in normoxic and hypoxic culture conditions for 5 days. Cell proliferation was measured using the trypan blue staining assay, and cell viability was measured using the CellTiter-Glo assay. Data are expressed as the mean  $\pm$  SD of experiments performed in triplicate (each group  $n = 3$ , \* $p < 0.05$ , \*\* $p < 0.01$ , t-test). HDFs, human adult dermal fibroblasts. Data images were produced using GraphPad Prism version 7.00 (GraphPad Software).

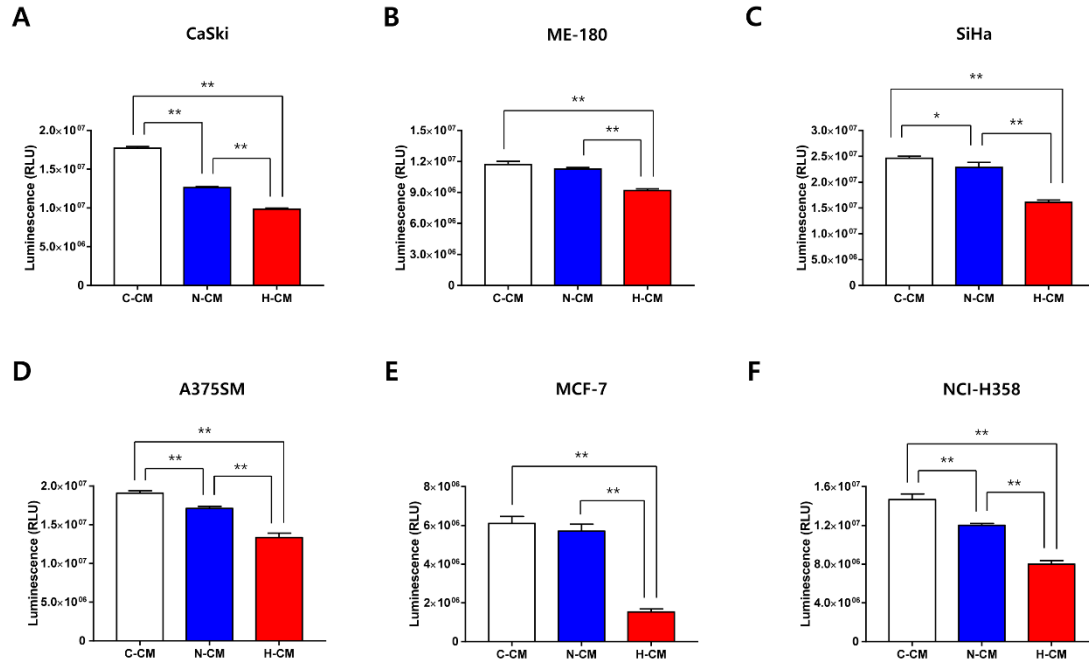

**Figure S3.** The viability of cervical cancer cells, melanoma cells, breast cancer cells, and lung cancer cells. The viability of three cervical cancer cell lines, CaSki (A), ME-180 (B), and SiHa cells (C), melanoma cells (A375SM) (D), breast cancer cells (MCF-7) (E), and lung cancer cells (NCI-H358) (F) after treatment with H-CM for 72 h, compared with C-CM and N-CM treatment. Cell viability was measured using the CellTiter-Glo assay. Data are expressed as the mean  $\pm$  SD of experiments performed in triplicate (each group  $n = 3$ , \* $p < 0.05$ , \*\* $p < 0.01$ , one-way ANOVA). C-CM, serum-free medium as control; N-CM, conditioned medium from normoxic HDFs; H-CM, conditioned medium from hypoxic HDFs. Data images were produced using GraphPad Prism version 7.00 (GraphPad Software).

**A**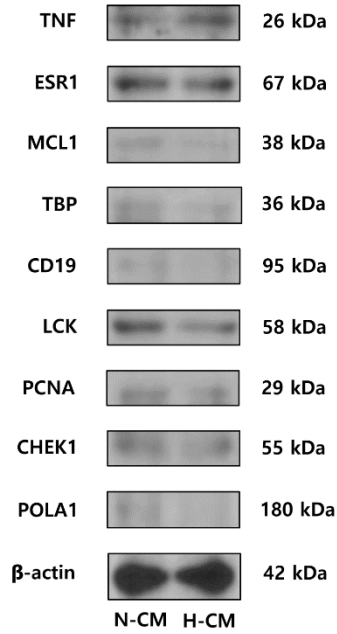**B**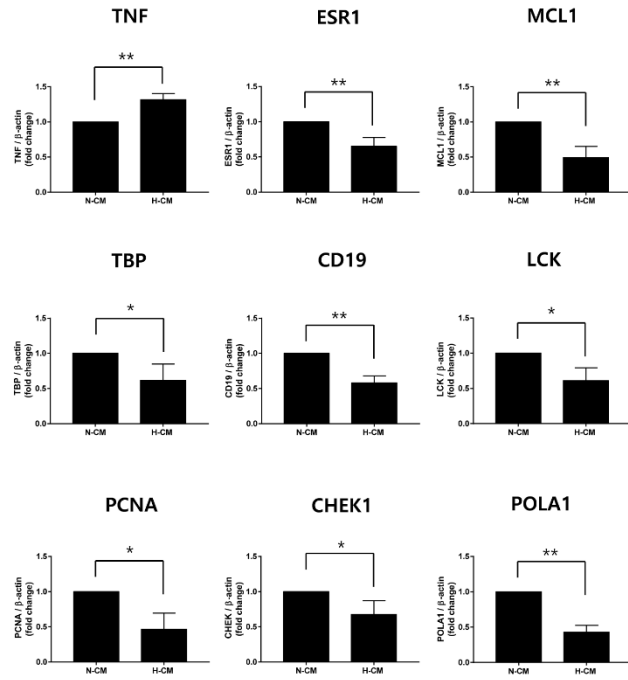

**Figure S4.** The expression of hub proteins (TNF, ESR1, MCL1, TBP, CD19, LCK, PCNA, CHEK1, and POLA1) in HeLa cells treated with N-CM and H-CM. The expression of hub proteins in HeLa cells treated with N-CM and H-CM for 24 h was analyzed with Western blotting (A). Quantitative amount of each hub proteins in HeLa cells treated H-CM compared with N-CM (B). N-CM, conditioned medium from normoxic HDFs; H-CM, conditioned medium from hypoxic HDFs. Data are expressed as the mean  $\pm$  SD of three independent experiment (biological replicates  $n = 3$ , \* $p < 0.05$ , \*\* $p < 0.01$ , t-test). Data images were produced using GraphPad Prism version 7.00 (GraphPad Software) and ImageJ 1.53k software (National Institutes of Health).
